# Supplementary material for: The Structure and Meaning of Planck's Constant
Source: Preprints.org preprint supplement (doi:10.20944/preprints202202.0068.v1), 2022-02-04
Supplement: Supplementary file 1 [file supplementary]

## Sheet: Tables
	lP	mP	tP	ƛC, e	ƛC, µ	ƛC, τ
	1.61626e-35	2.17643e-08	5.39125e-44	3.86159e-13	1.86759e-15	1.11054e-16
	ℏ	c		m0, e	m0, µ	m0, τ
	1.05457e-34	299792458		9.10938e-31	1.88353e-28	3.16754e-27
	Table 1
	Natural unit	Symbol	Planck formula
	Planck length	lP
	Planck mass	mP
	Planck time	tP
	Table 2
	Physical constant	Symbol	Natural unit formula	Simple formula
	Speed of light	c		c
	Reduced Planck constant	ℏ
	Gravitational constant	G
	Table 3
	Natural unit	Planck formula	Natural unit formula
	Planck length
	Planck mass
	Planck time
	Table 4
	βλ	βv
	Table 5
	Particle	m0	v	ƛ	E	E
		kg	m/s	m	kgm2/s2	kgm2/s2
		CODATA	arbitrary
	e	9.10938e-31	2997924	3.86159e-11	4.09355e-18	4.09355e-18
	µ	1.88353e-28	1000000	5.59891e-13	9.41766e-17	9.41765e-17
	τ	3.16754e-27	100000000	3.32931e-16	1.58377e-11	1.58377e-11
	Table 6
	Physical property	Symbol	Ratios	Unit potential	Natural formula
	Wavelength	ƛ		lP
	Rest mass	m0		mP
	Momentum	p		mPc
	Oscillation period	T		tP
	Kinetic energy	EK		EP
	Total energy	E		EP
	Table 7
	Wavelength	Rest mass	Momentum	Period	* Kinetic energy
	m	kg	kgm / s	s	kgm2/s2
	Table 8
		ƛC	m0	ƛCm0	v	ƛ	m	ƛm	ƛ	βλ	βv
		m	kg	kgm	m/s	m	kg	kgm
		CODATA	CODATA		arbitrary
	e	3.86159e-13	9.10938e-31	3.51767e-43	2997924	3.86159e-11	9.10938e-33	3.51767e-43	3.86159e-11	4.18546e-25	0.01
	µ	1.86759e-15	1.88353e-28	3.51767e-43	1000000	5.59891e-13	6.28278e-31	3.51767e-43	5.59891e-13	2.88673e-23	0.00333564
	τ	1.11054e-16	3.16754e-27	3.51767e-43	100000000	3.32931e-16	1.05658e-27	3.51767e-43	3.32931e-16	4.85463e-20	0.333564
	γ	-	-	-	299792458	2e-08	1.75884e-35	3.51767e-43	2e-08	8.08127e-28	1
	Particle	p	T	E	ƛp	TE, 2TE
		kgm/s	s	kgm2/s2	kgm2/s	kgm2/s
					-
	e	2.73092e-24	1.28809e-17	4.09355e-18	1.05457e-34	1.05457e-34
	µ	1.88353e-22	5.59891e-19	9.41766e-17	1.05457e-34	1.05457e-34
	τ	3.16754e-19	3.32931e-24	1.58377e-11	1.05457e-34	1.05457e-34
	γ	5.27286e-27	6.67128e-17	1.58076e-18	1.05457e-34	1.05457e-34
	B1
	Particle	ƛC	m0	ƛC m0	lPmP	lP / ƛC	m0 / mP
		m	kg	—	—	—	—
	e	3.86159e-13	9.10938e-31	3.51767e-43	3.51767e-43	4.18546e-23	4.18546e-23
	µ	1.86759e-15	1.88353e-28	3.51767e-43	3.51767e-43	8.65421e-21	8.65421e-21
	τ	1.11054e-16	3.16754e-27	3.51767e-43	3.51767e-43	1.45538e-19	1.45538e-19
	B2
	Particle	ƛC	m0	v	ƛ	ƛC / ƛ	v/c
		m/s	kg	m/s	m	—	—
		CODATA	CODATA	arbitrary
	e	3.86159e-13	9.10938e-31	2997924	3.86159e-11	0.01	0.01
	µ	1.86759e-15	1.88353e-28	1000000	5.59891e-13	0.00333564	0.00333564
	τ	1.11054e-16	3.16754e-27	100000000	3.32931e-16	0.333564	0.333564
	B3-a
	Particle	ƛC	m0	v	ƛ	lP / ƛ	m0v / mPc
		m/s	kg	m/s	m	—	—
		CODATA	CODATA	arbitrary
	e	3.86159e-13	9.10938e-31	2997924	3.86159e-11	4.18546e-25	4.18546e-25
	µ	1.86759e-15	1.88353e-28	1000000	5.59891e-13	2.88673e-23	2.88673e-23
	τ	1.11054e-16	3.16754e-27	100000000	3.32931e-16	4.85463e-20	4.85463e-20
	B3-b
	Particle	m0	v	ƛ	p
		kg	m/s	m	kgm/s
		CODATA	arbitrary
	e	9.10938e-31	2997924	3.86159e-11	2.73092e-24
	µ	1.88353e-28	14499	3.86159e-11	2.73092e-24
	τ	3.16754e-27	862.159	3.86159e-11	2.73092e-24
	γ	-	299792458	3.86159e-11	2.73092e-24
	4.18546e-23
	βλ	βv	velocity	ƛ	m	p	T	EK	E	m0	Δƛ Δv	Δƛ Δp	Δp / Δv
				m	kg	kgm/s	s	kgm2/s2	kgm2/s3	kg	—	—	—
	4.18546e-23	1	299792458	3.86159e-13	9.10938e-31	2.73092e-22	1.28809e-21	4.09355e-14	1.15783e-13	9.10938e-31	—	—	—
	4.18128e-23	0.999	2.99493e+08	3.86546e-13	9.10027e-31	2.72819e-22	1.29067e-21	4.08537e-14	1.15725e-13	9.10938e-31	1	1	1
	3.76692e-23	0.9	2.69813e+08	4.29066e-13	8.19844e-31	2.45783e-22	1.59023e-21	3.31578e-14	1.10146e-13	9.10938e-31	1	1	1
	2.09273e-23	0.5	149896229	7.72319e-13	4.55469e-31	1.36546e-22	5.15236e-21	1.02339e-14	9.15346e-14	9.10938e-31	1	1	1
	1.25564e-23	0.3	8.99377e+07	1.2872e-12	2.73281e-31	8.19277e-23	1.43121e-20	3.6842e-15	8.54759e-14	9.10938e-31	1	1	1
	3.05428e-25	0.00729735	2.18769e+06	5.29177e-11	6.64744e-33	1.99285e-24	2.41888e-17	2.17987e-18	8.18732e-14	9.10938e-31	1	1	1
	1.52714e-25	0.00364868	1.09385e+06	1.05835e-10	3.32372e-33	9.96426e-25	9.67554e-17	5.44968e-19	8.18716e-14	9.10938e-31	1	1	1
	1.01809e-25	0.00243245	729230	1.58753e-10	2.21581e-33	6.64284e-25	2.177e-16	2.42208e-19	8.18713e-14	9.10938e-31	1	1	1

## Sheet: Symmetry
																					SYMMETRY
					1.61626e-35			2.17643e-08			6.52478			5.39125e-44			1.95608e+09
					meters	meters		kilograms	kilograms		kgm/s	kgm/s		seconds	seconds		kgm2/s2	kgm2/s3
			PARTICLE PROPERTIES:
	particle											𝑚₀𝑣						½𝑚₀𝑣²
		9.10938e-31	298670		3.87611e-10	3.87611e-10		9.07528e-34	9.07528e-34		2.7207e-25	2.7207e-25		1.29779e-15	1.29779e-15		4.06296e-20	4.06296e-20		3.51767e-43	1.05457e-34	1.05457e-34
			7382931		1.56804e-11	1.56804e-11		2.24335e-32	2.24335e-32		6.72539e-24	6.7254e-24		2.12388e-18	2.12388e-18		2.48266e-17	2.48266e-17		3.51767e-43	1.05457e-34	1.05457e-34
		1.88353e-28	9828429		5.69664e-14	5.69664e-14		6.17499e-30	6.17499e-30		1.85122e-21	1.85122e-21		5.79609e-21	5.79609e-21		9.09727e-15	9.09727e-15		3.51767e-43	1.05457e-34	1.05457e-34
			38901692		1.43925e-14	1.43925e-14		2.44411e-29	2.44411e-29		7.32726e-21	7.32726e-21		3.6997e-22	3.6997e-22		1.42521e-13	1.42521e-13		3.51767e-43	1.05457e-34	1.05457e-34
		3.16754e-27	2983244		1.116e-14	1.116e-14		3.15203e-29	3.15203e-29		9.44954e-21	9.44954e-21		3.7409e-21	3.7409e-21		1.40951e-14	1.40951e-14		3.51767e-43	1.05457e-34	1.05457e-34
			78203363		4.25724e-16	4.25724e-16		8.26279e-28	8.26279e-28		2.47712e-19	2.47712e-19		5.44381e-24	5.44381e-24		9.68597e-12	9.68597e-12		3.51767e-43	1.05457e-34	1.05457e-34
	λC τ	-̶̶̶	299792458		1.11054e-16	1.11054e-16		3.16754e-27	3.16754e-27		9.49604e-19	9.49604e-19		3.70436e-25	3.70436e-25		2.84684e-10	2.84684e-10		3.51767e-43	1.05457e-34	1.05457e-34
	λC µ	-̶̶̶	299792458		1.86759e-15	1.86759e-15		1.88353e-28	1.88353e-28		5.64668e-20	5.64669e-20		6.22962e-24	6.22962e-24		1.69283e-11	1.69283e-11		3.51767e-43	1.05457e-34	1.05457e-34
	λC	-̶̶̶	299792458		3.86159e-13	3.86159e-13		9.10938e-31	9.10938e-31		2.73092e-22	2.73092e-22		1.28809e-21	1.28809e-21		8.1871e-14	8.18711e-14		3.51767e-43	1.05457e-34	1.05457e-34
	λH, 1s-2p	-̶̶̶	299792458		1.9348e-08	1.9348e-08		1.81811e-35	1.81811e-35		5.45055e-27	5.45055e-27		6.4538e-17	6.45379e-17		1.63403e-18	1.63403e-18		3.51767e-43	1.05457e-34	1.05457e-34
		3.51767e-43				1.05457e-34			299792458
